# Supplementary material for: A Comparison of the Photophysical, Electrochemical and Cytotoxic Properties of meso-(2-, 3- and 4-Pyridyl)-BODIPYs and Their Derivatives
Source: MDPI journal article supplement (doi:10.3390/s22145121), 2022-07-07
Supplement: s1 [file s1]

## Supplementary Materials

# A Comparison of the Photophysical and Electrochemical Properties of *meso*-(2-, 3- and 4-Pyridyl)-BODIPYs and Their Derivatives

Caroline Ndung’U <sup>1</sup>, Daniel J. LaMaster <sup>1</sup>, Simran Dhingra <sup>1</sup>, Nathan H. Mitchell <sup>1</sup>, Petia Bobadova-Parvanova, <sup>2</sup> Frank R. Fronczek <sup>1</sup>, Noémie Elgrishi <sup>1</sup> and Maria da Graça H. Vicente <sup>1,\*</sup>

<sup>1</sup> Department of Chemistry, Louisiana State University, Baton Rouge, LA 70803, USA

<sup>2</sup> Department of Chemistry and Fermentation Sciences, Appalachian State University, Boone, NC 28608, USA

\* Correspondence: vicente@lsu.edu

### Table of Contents

|                                                                      |   |
|----------------------------------------------------------------------|---|
| Spectroscopic data in methanol .....                                 | 2 |
| Absorption and emission spectra .....                                | 3 |
| Dark and phototoxicity .....                                         | 3 |
| <sup>1</sup> H, <sup>13</sup> C and <sup>11</sup> B NMR spectra..... | 4 |

**Table S1.** Relative fluorescence quantum yields determined using rhodamine-6G ( $\Phi=0.86$ ) in methanol,  $\lambda_{\text{exc}}=473\text{nm}$

| Solvent            | BODIPY             | $\lambda_{\text{abs}}$<br>(nm) | $\lambda_{\text{em}}$ (nm) | Stokes<br>Shift<br>(nm) | $\Phi_f$ | $\epsilon$ ( $\text{M}^{-1} \text{cm}^{-1}$ ) |
|--------------------|--------------------|--------------------------------|----------------------------|-------------------------|----------|-----------------------------------------------|
| CH <sub>3</sub> OH | 2Py                | 504                            | 514                        | 10                      | 0.13     | 119800                                        |
|                    | 3Py                | 503                            | 515                        | 12                      | 0.34     | 98140                                         |
|                    | 2PyCl <sub>2</sub> | 531                            | 548                        | 17                      | 0.23     | 69940                                         |
|                    | 3PyCl <sub>2</sub> | 530                            | 546                        | 16                      | 0.57     | 66880                                         |

(a)

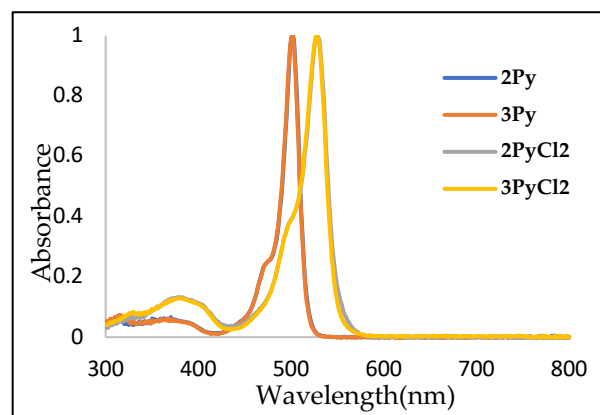

(b)

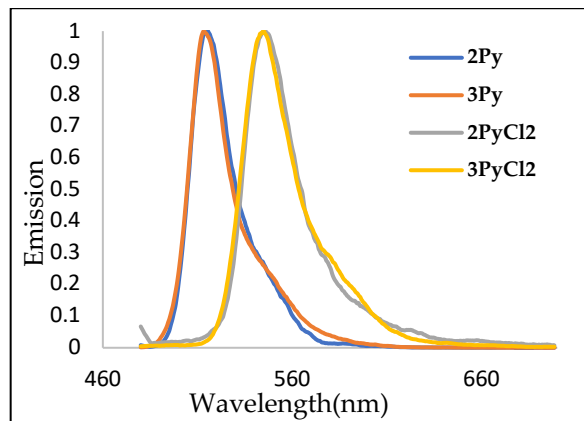

(c)

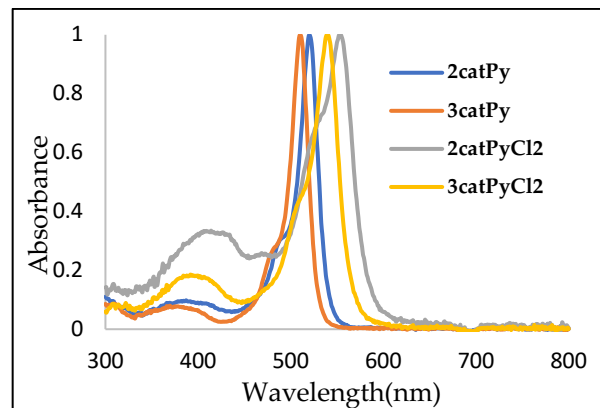

(d)

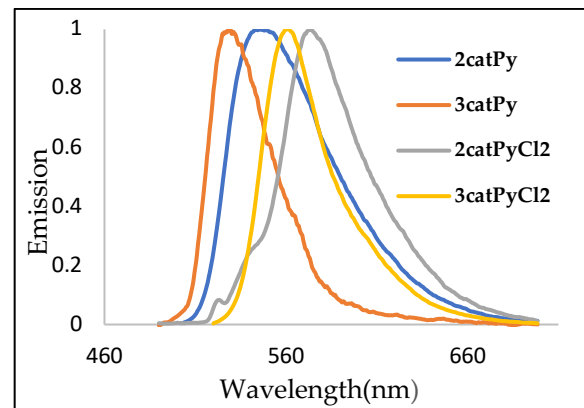

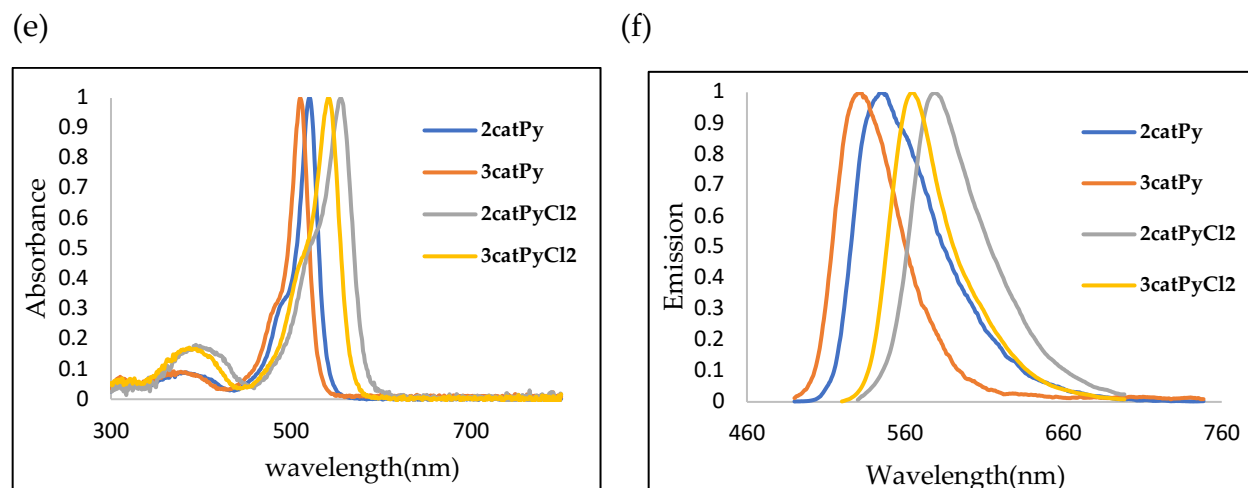

**Figure S1.** Normalized absorption (a, c, e) and emission (b, d, f) spectra of BODIPYs in acetonitrile (a, b, c, d) and water (e, f).

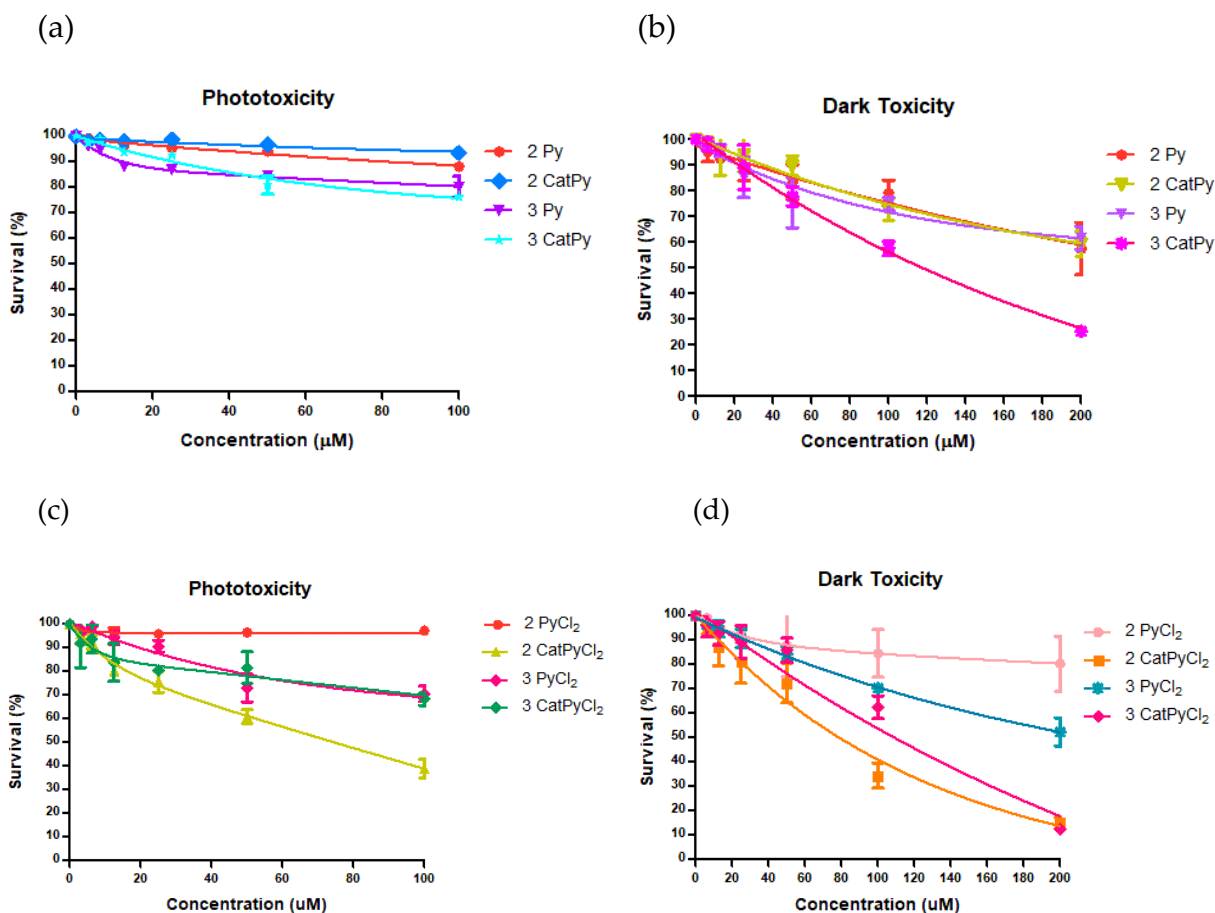

**Figure S2.** Dark (b, d) and photo (a, c) ( $1.5 \text{ J/cm}^2$ ) cytotoxicity of BODIPYs towards HEp2 cells.

# NMR

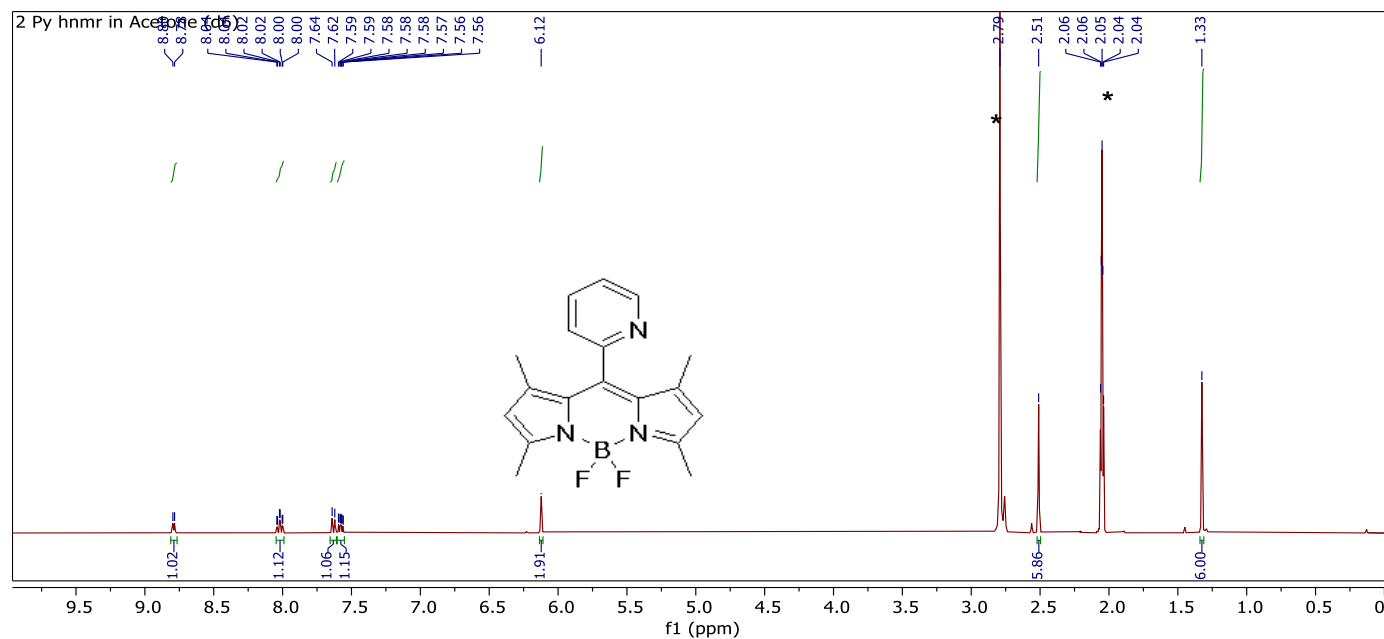

**Figure S3.** <sup>1</sup>H NMR of BODIPY 2Py in acetone-d<sub>6</sub>

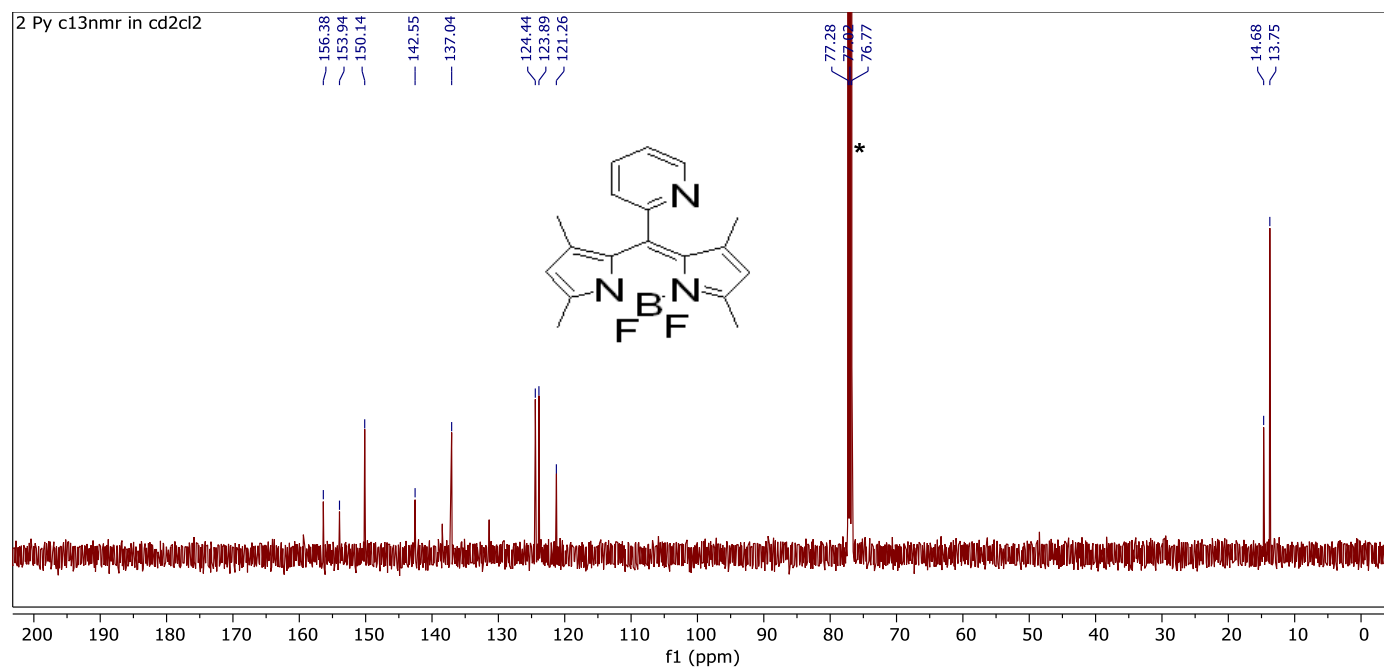

**Figure S4.** <sup>13</sup>C NMR of BODIPY 2Py in CDCl<sub>3</sub>

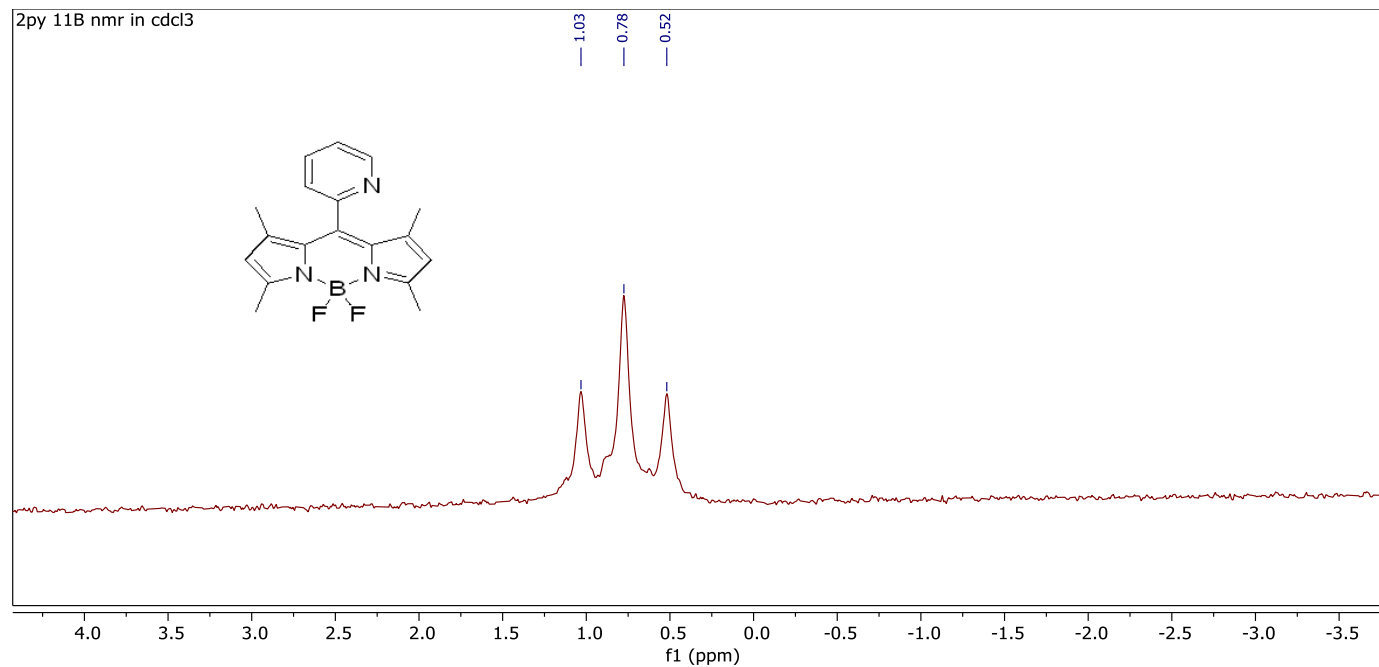

**Figure S5.**  $^{11}\text{B}$  NMR of BODIPY 2Py in  $\text{CDCl}_3$

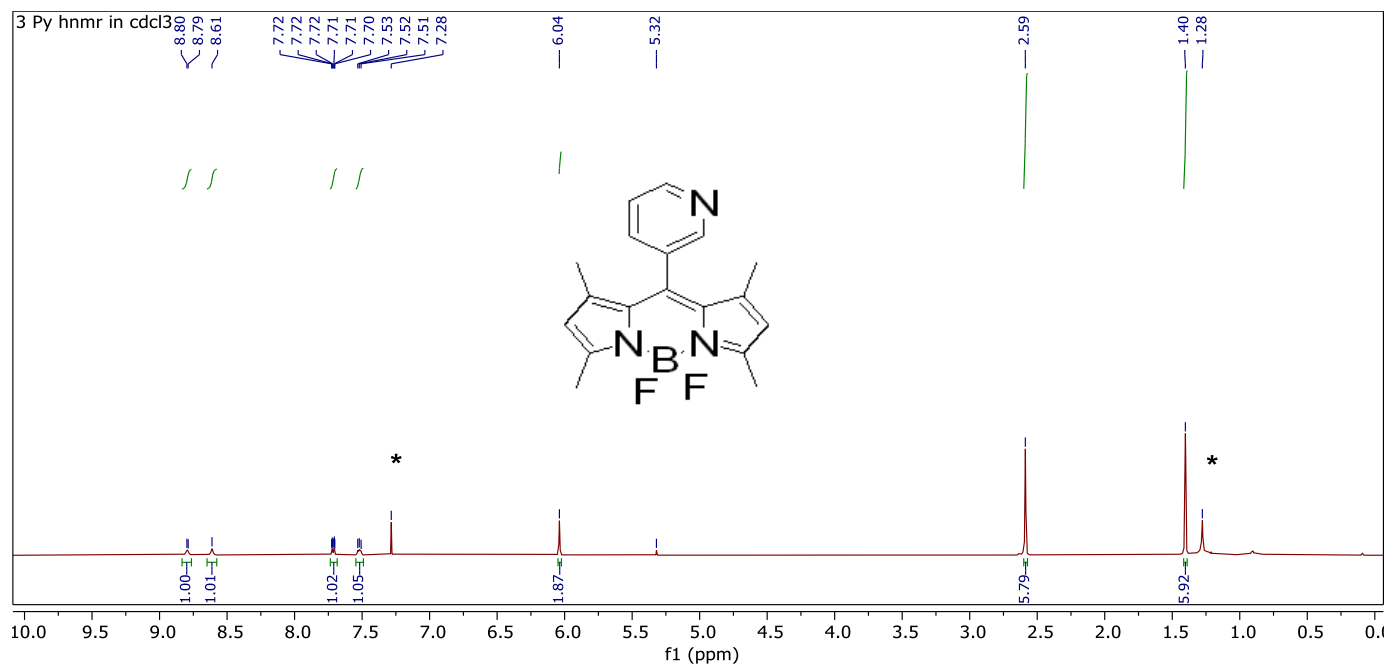

**Figure S6.**  $^1\text{H}$  NMR of BODIPY 3Py in  $\text{CDCl}_3$

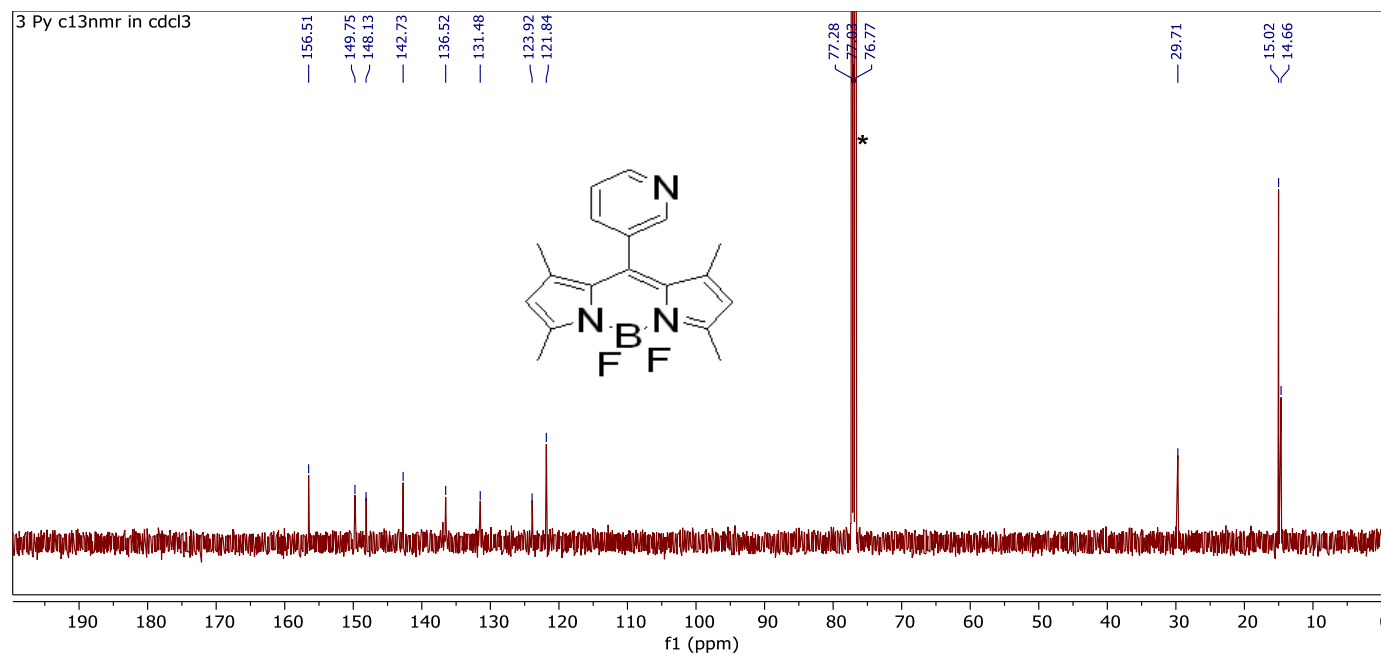

**Figure S7.**  $^{13}\text{C}$  NMR of BODIPY 3Py in  $\text{CDCl}_3$

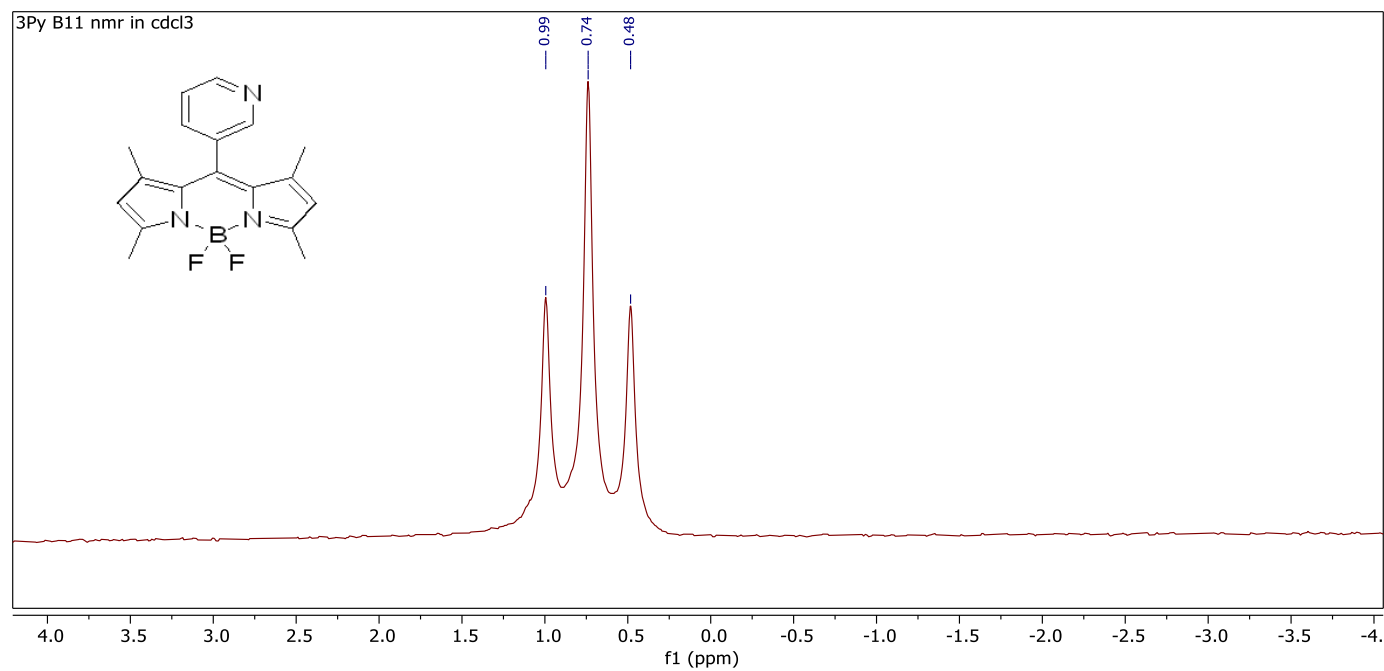

**Figure S8.**  $^{11}\text{B}$  NMR of BODIPY 3Py in  $\text{CDCl}_3$

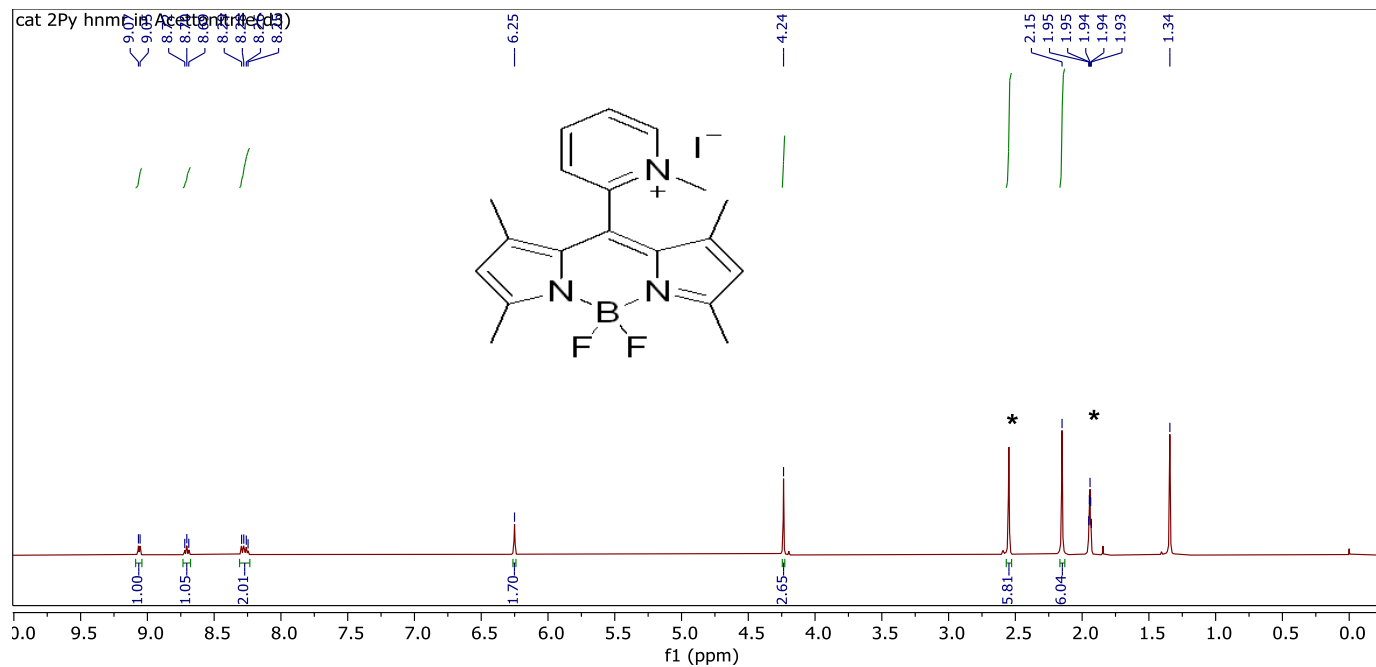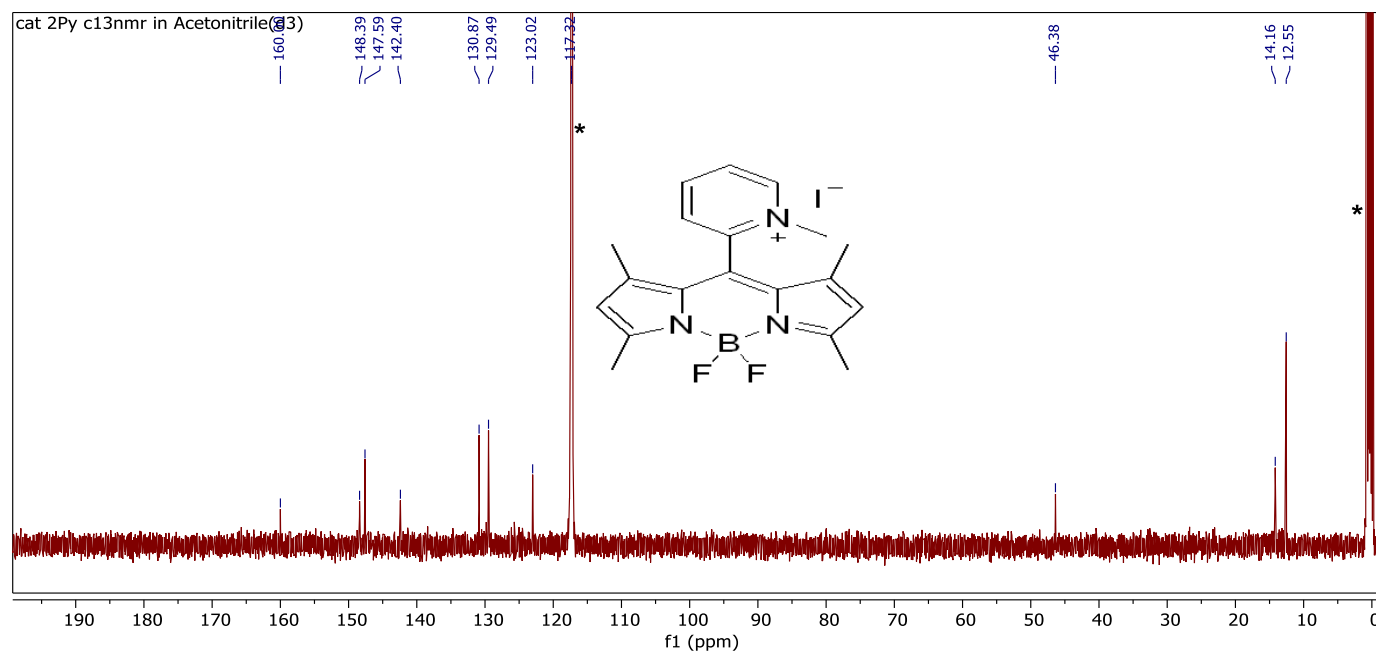

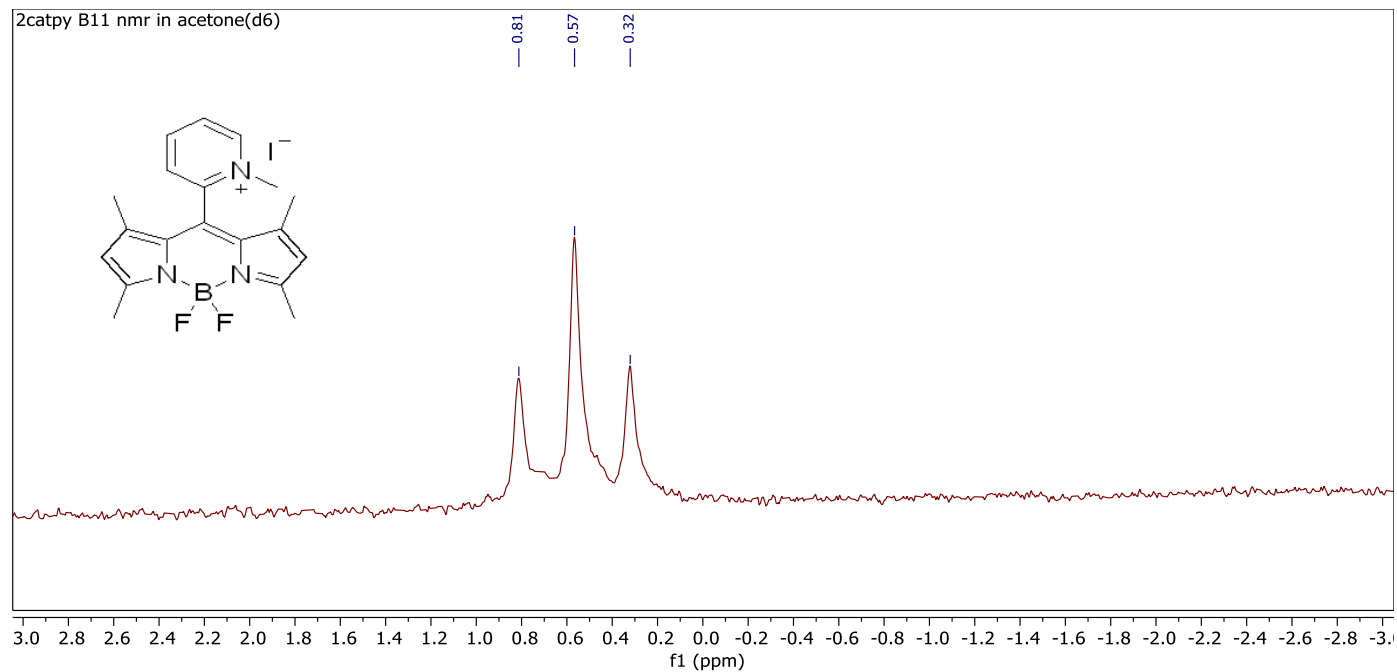

**Figure S11.**  $^{11}\text{B}$  NMR of BODIPY 2catPy in acetone- $\text{d}_6$

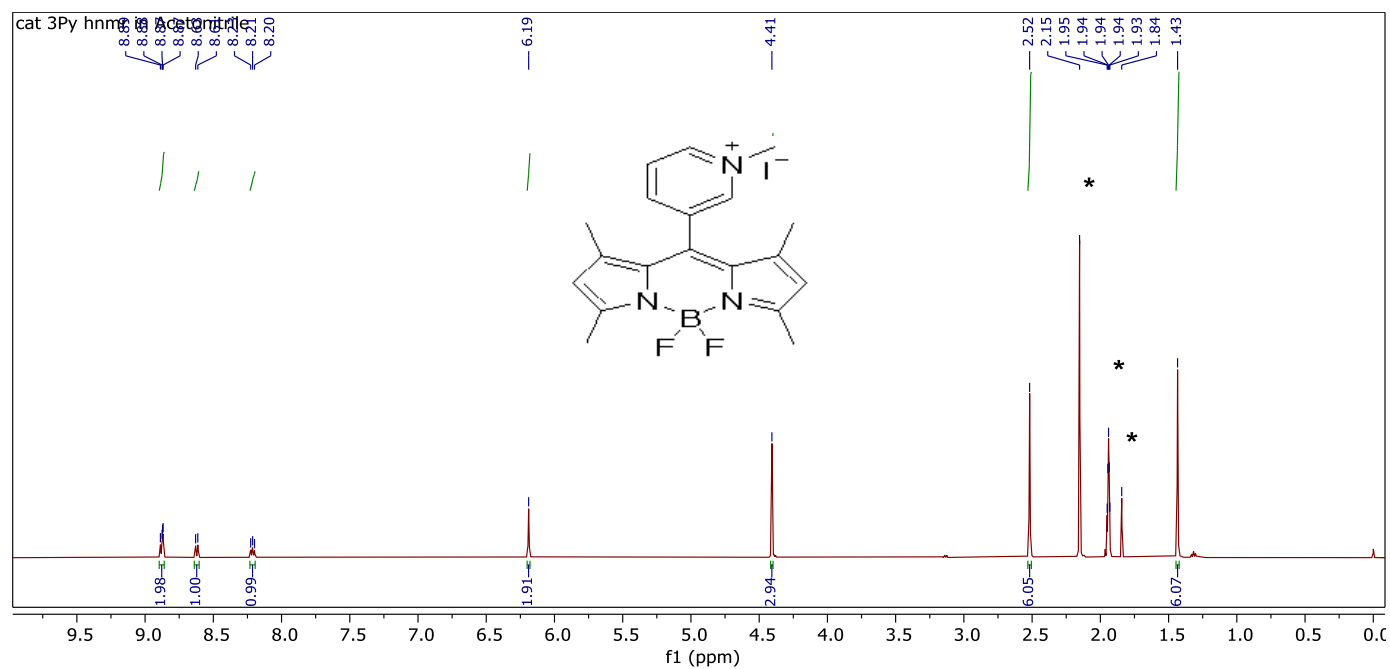

**Figure S12.**  $^1\text{H}$  NMR of BODIPY 3catPy in acetone- $\text{d}_6$



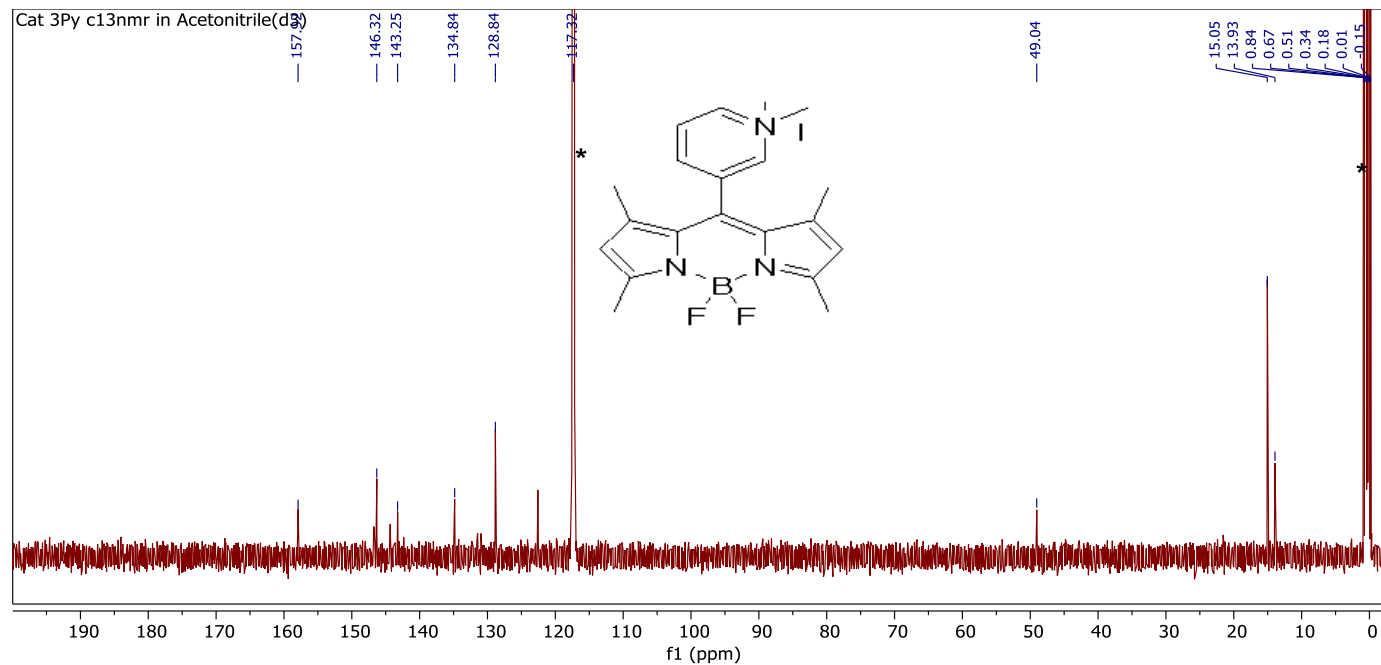

**Figure S13.**  $^{13}\text{C}$  NMR of BODIPY 3catPy in acetonitrile- $\text{d}_3$

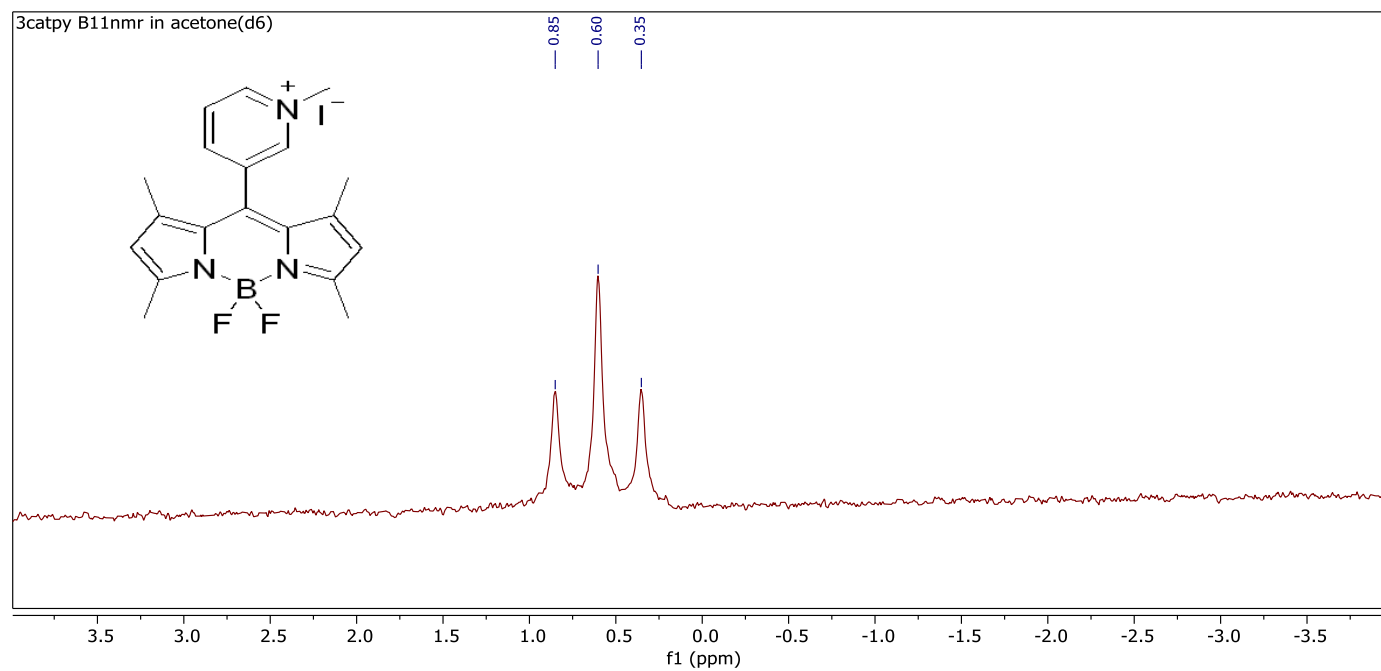

**Figure S14.**  $^{11}\text{B}$  NMR of BODIPY 3catPy in acetone- $\text{d}_6$

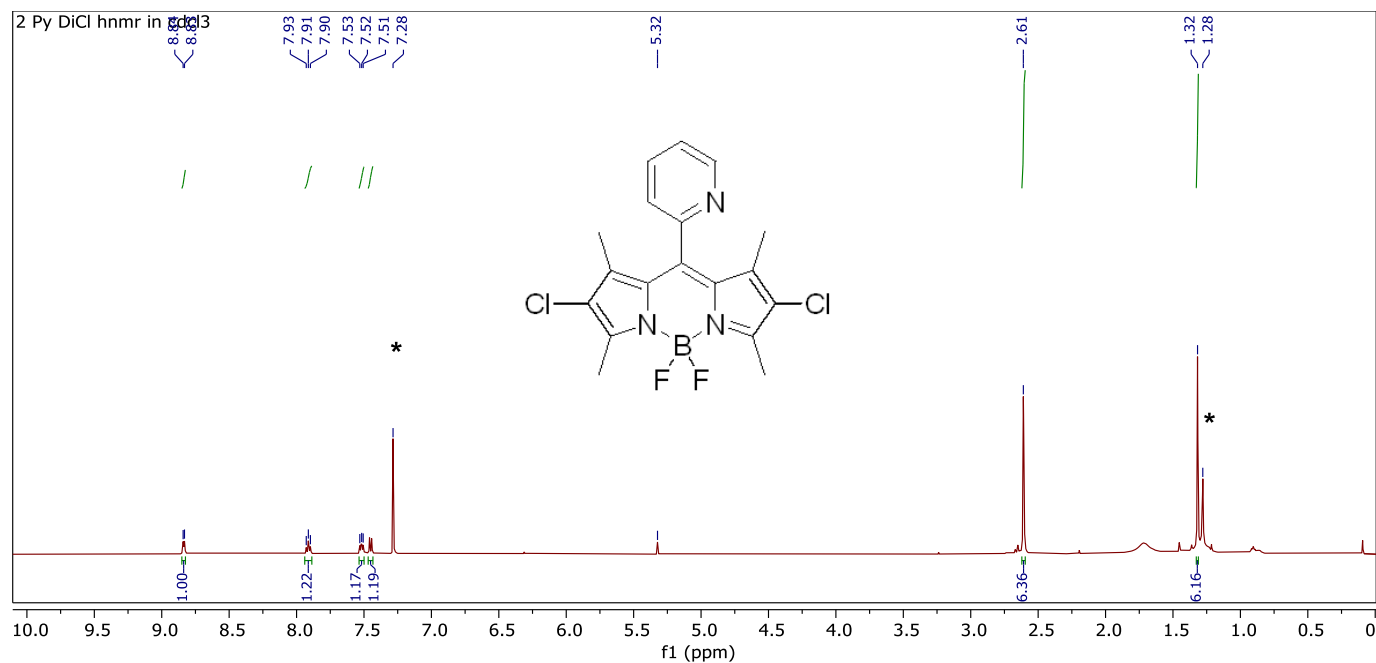

**Figure S15.** <sup>1</sup>H NMR of BODIPY 2PyCl<sub>2</sub> in CDCl<sub>3</sub>

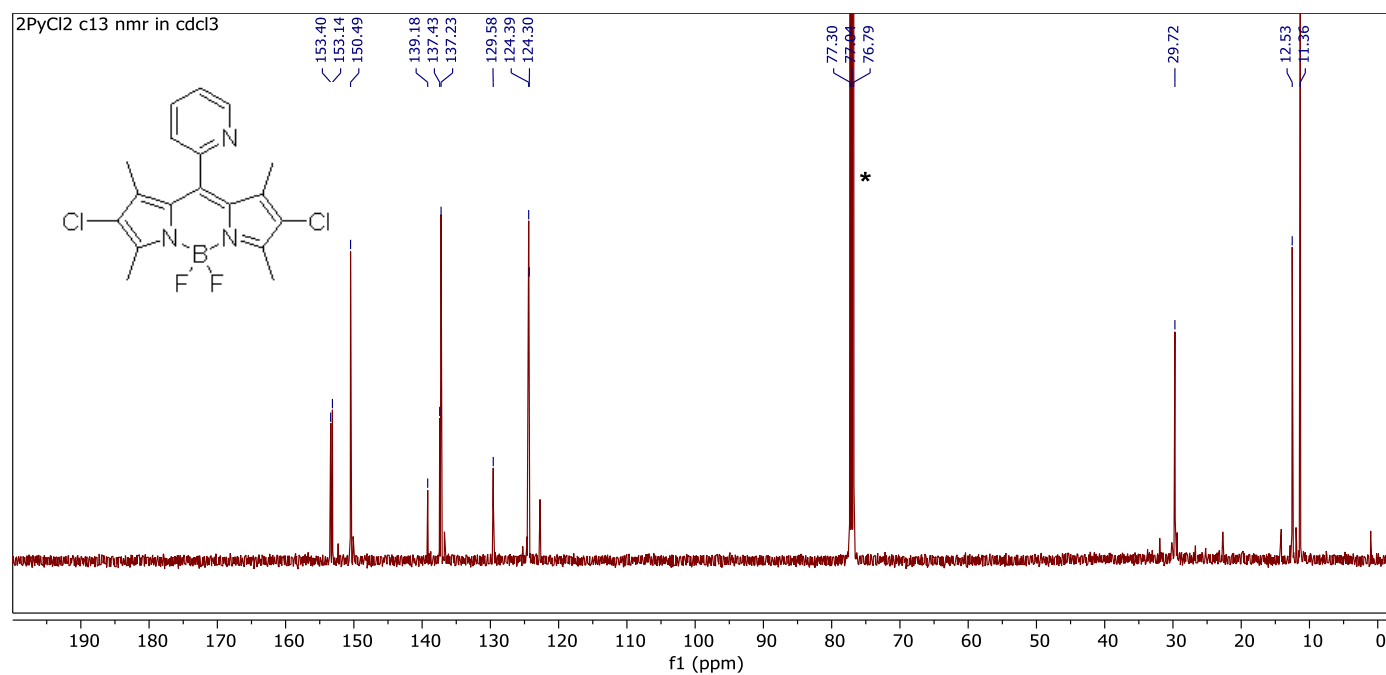

**Figure S16.** <sup>13</sup>C NMR of BODIPY 2PyCl<sub>2</sub> in CDCl<sub>3</sub>

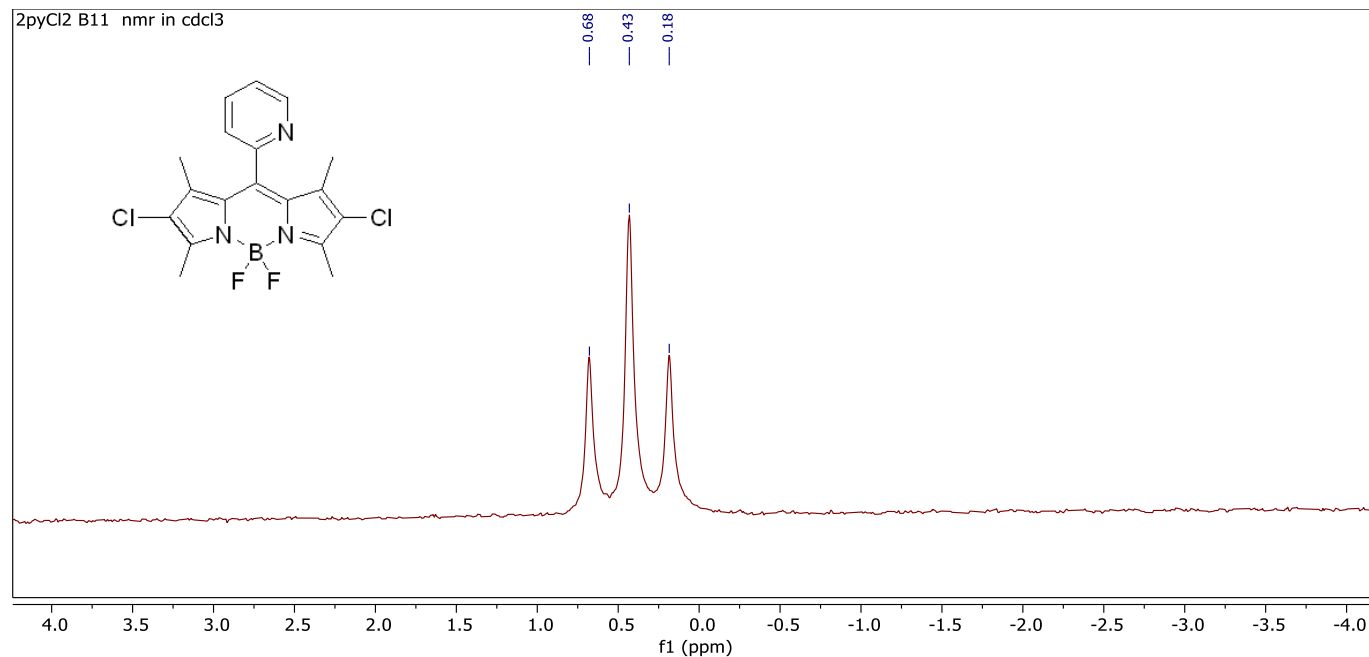

Figure S17. <sup>11</sup>B NMR of BODIPY 2PyCl<sub>2</sub> in CDCl<sub>3</sub>

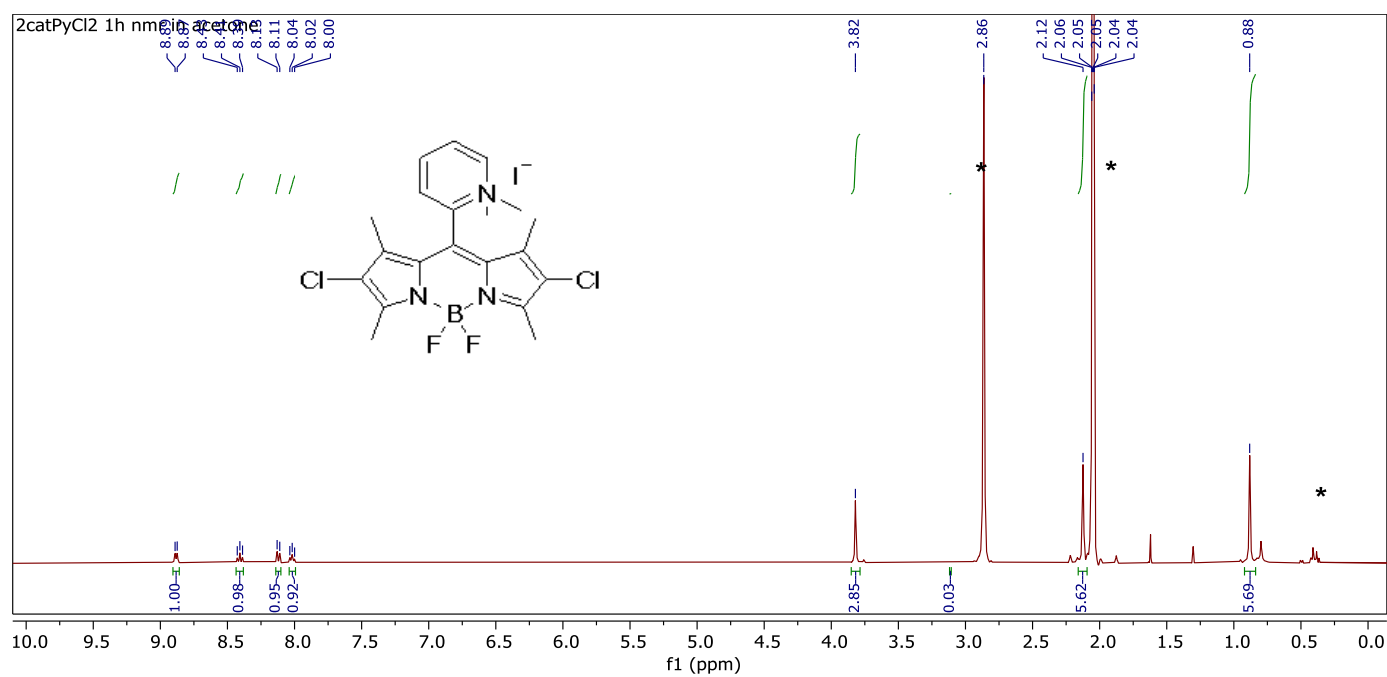

Figure S18. <sup>1</sup>H NMR of BODIPY 2catPyCl<sub>2</sub> in acetone-d<sub>6</sub>

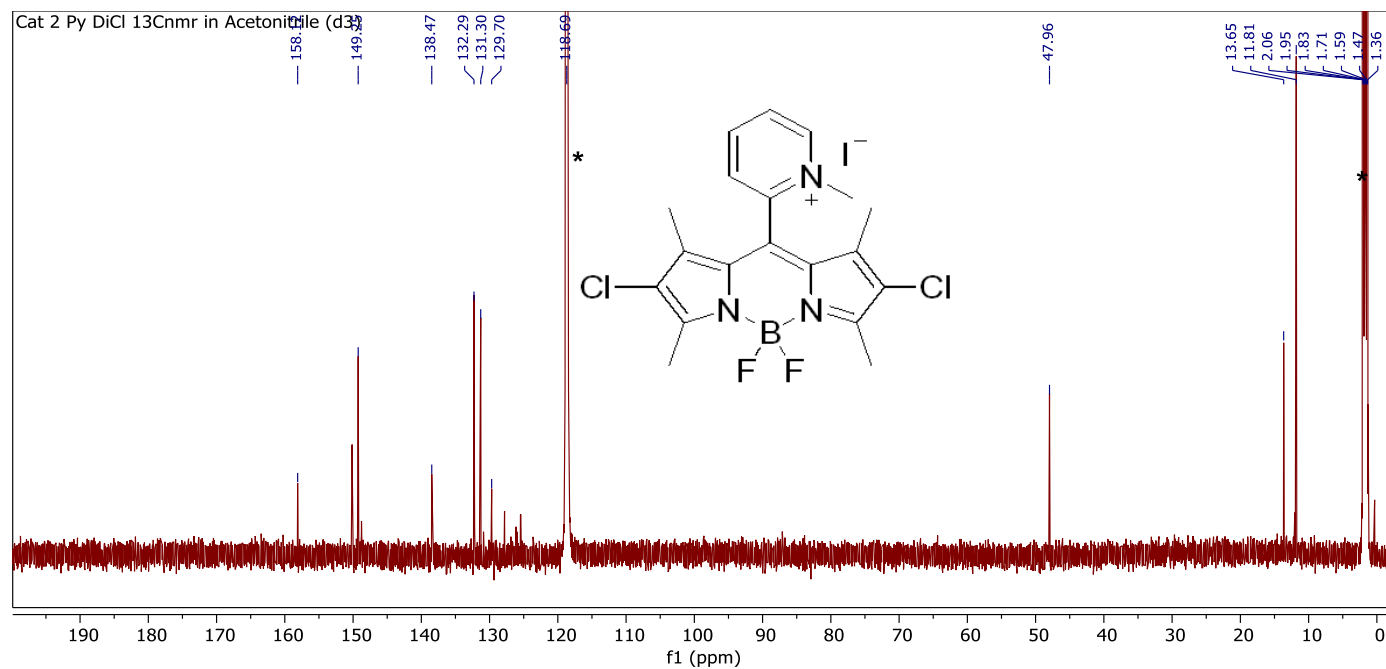

**Figure S19.** <sup>13</sup>C NMR of BODIPY 2catPyCl<sub>2</sub> in acetonitrile-d<sub>3</sub>

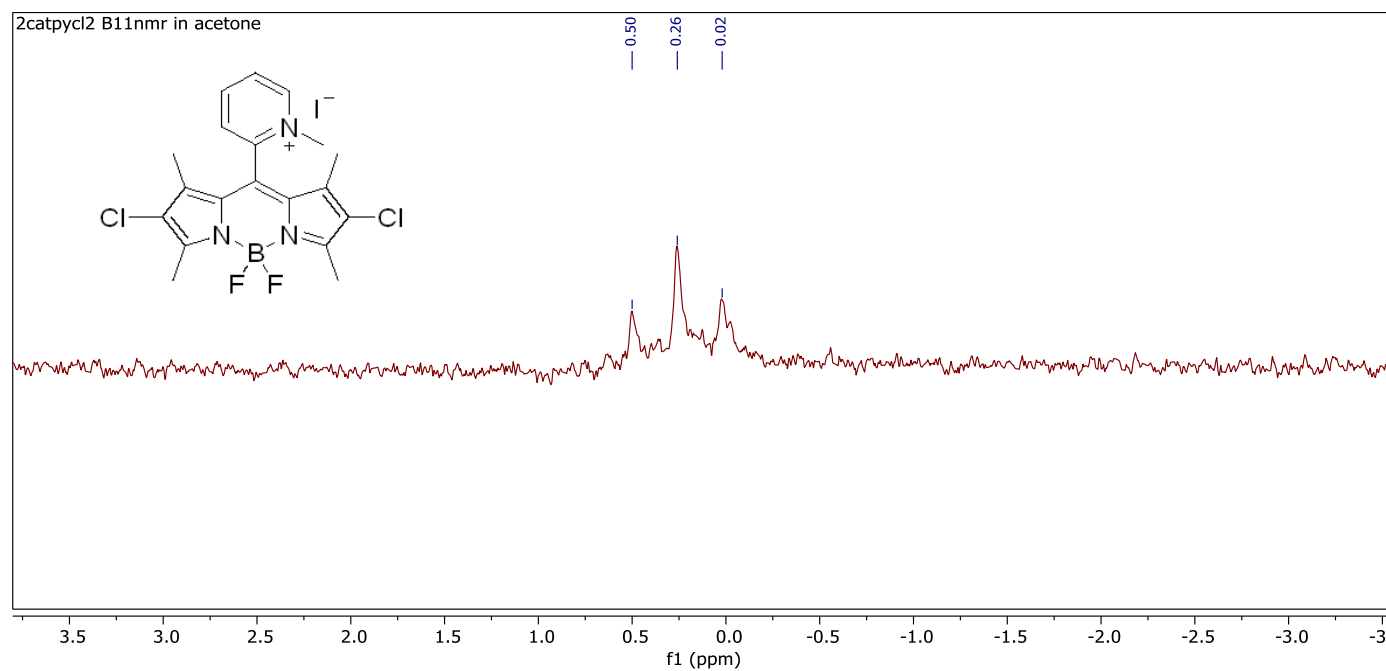

**Figure S20.** <sup>11</sup>B NMR of BODIPY 2catPyCl<sub>2</sub> in acetone-d<sub>6</sub>

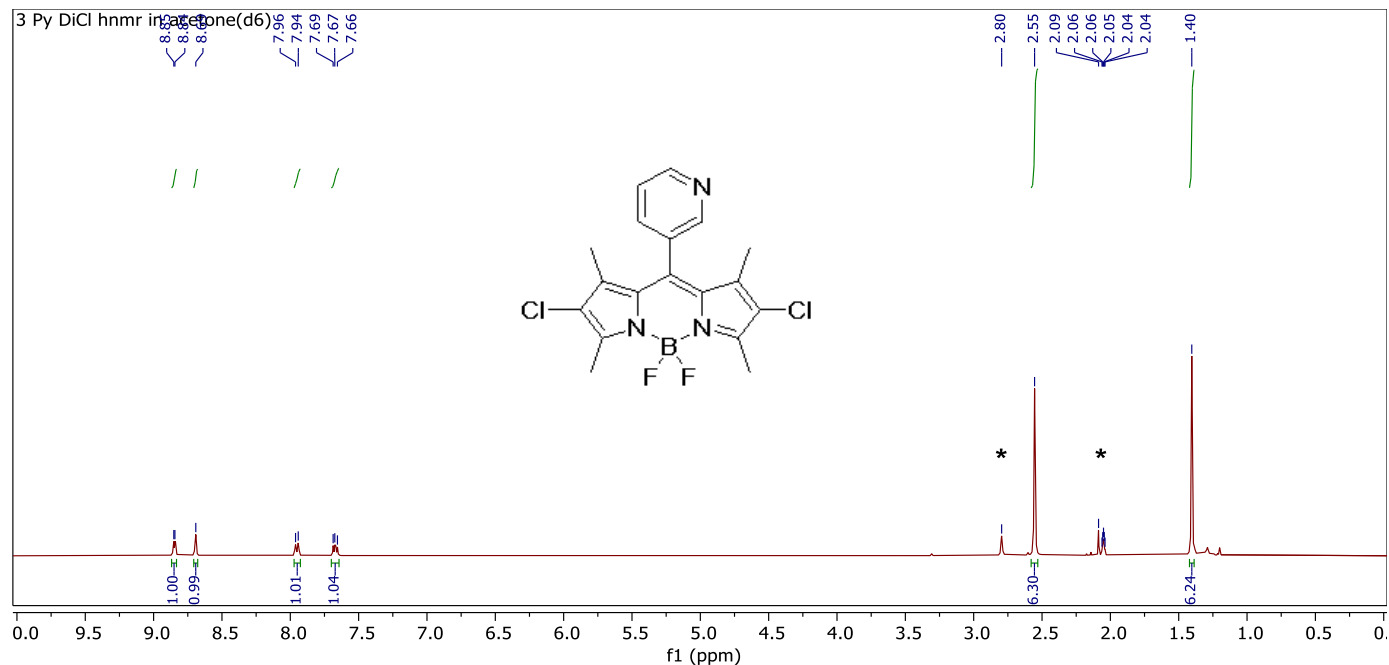

Figure S21. <sup>1</sup>H NMR of BODIPY 3PyCl<sub>2</sub> in acetone-d<sub>6</sub>

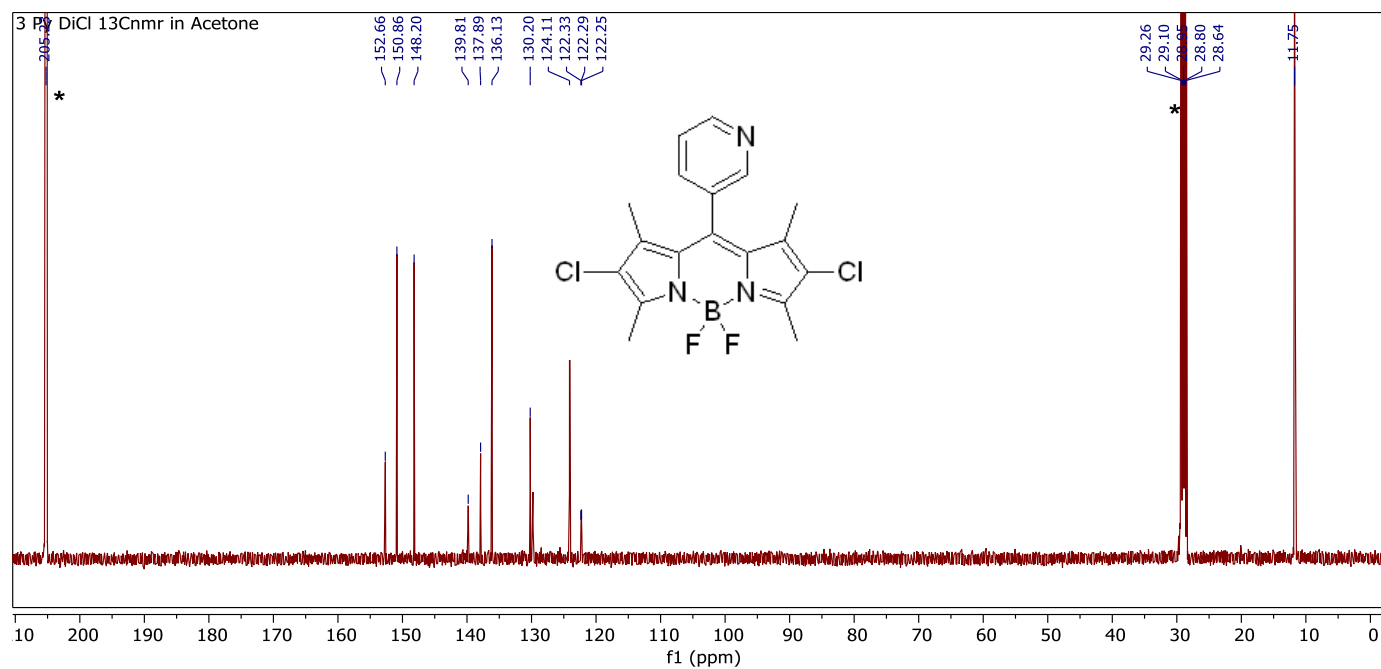

Figure S22. <sup>13</sup>C NMR of BODIPY 3PyCl<sub>2</sub> in acetone-d<sub>6</sub>

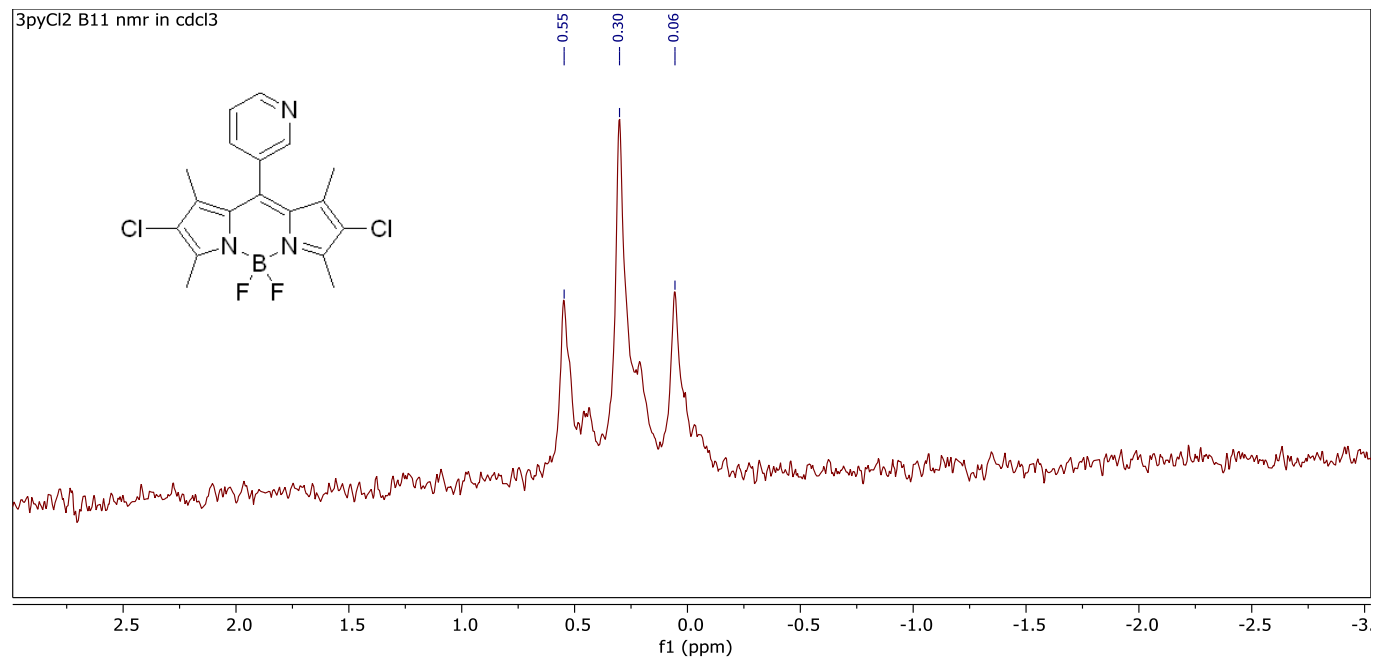

**Figure S23.**  $^{11}\text{B}$  NMR of BODIPY 3PyCl<sub>2</sub> in CDCl<sub>3</sub>

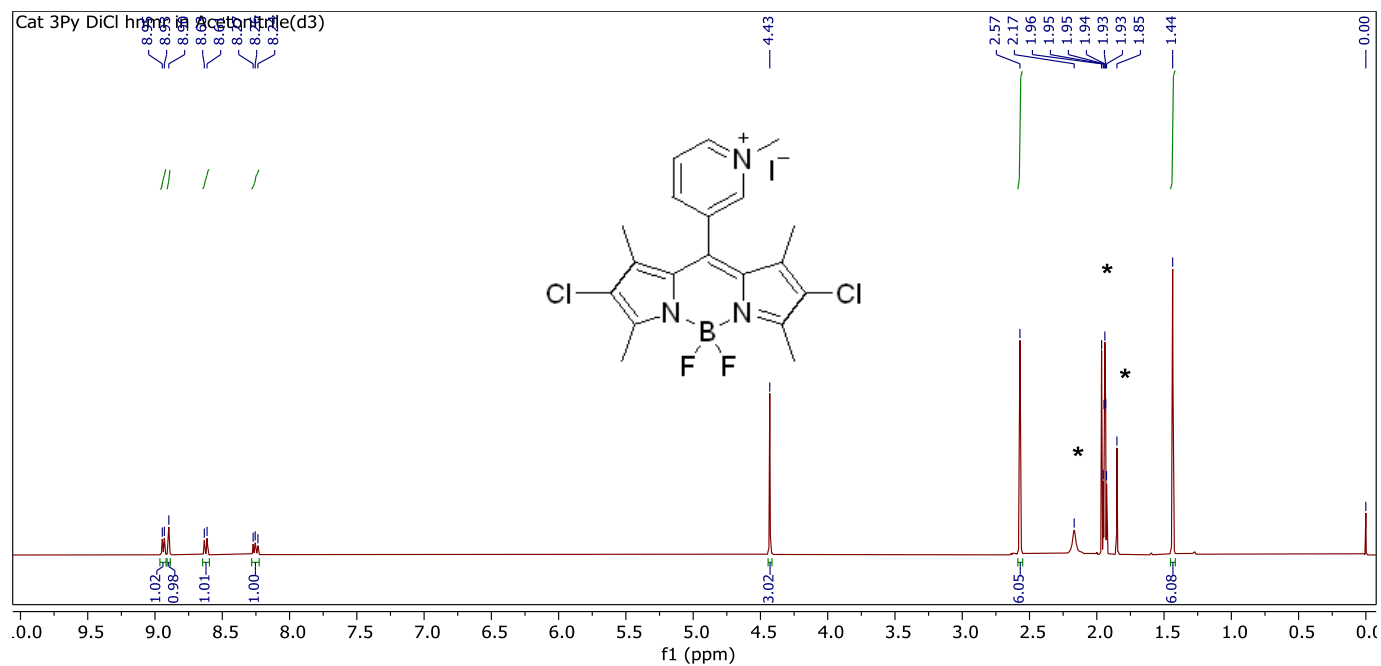

**Figure S24.**  $^1\text{H}$  NMR of BODIPY 3catPyCl<sub>2</sub> in acetonitrile-d<sub>3</sub>

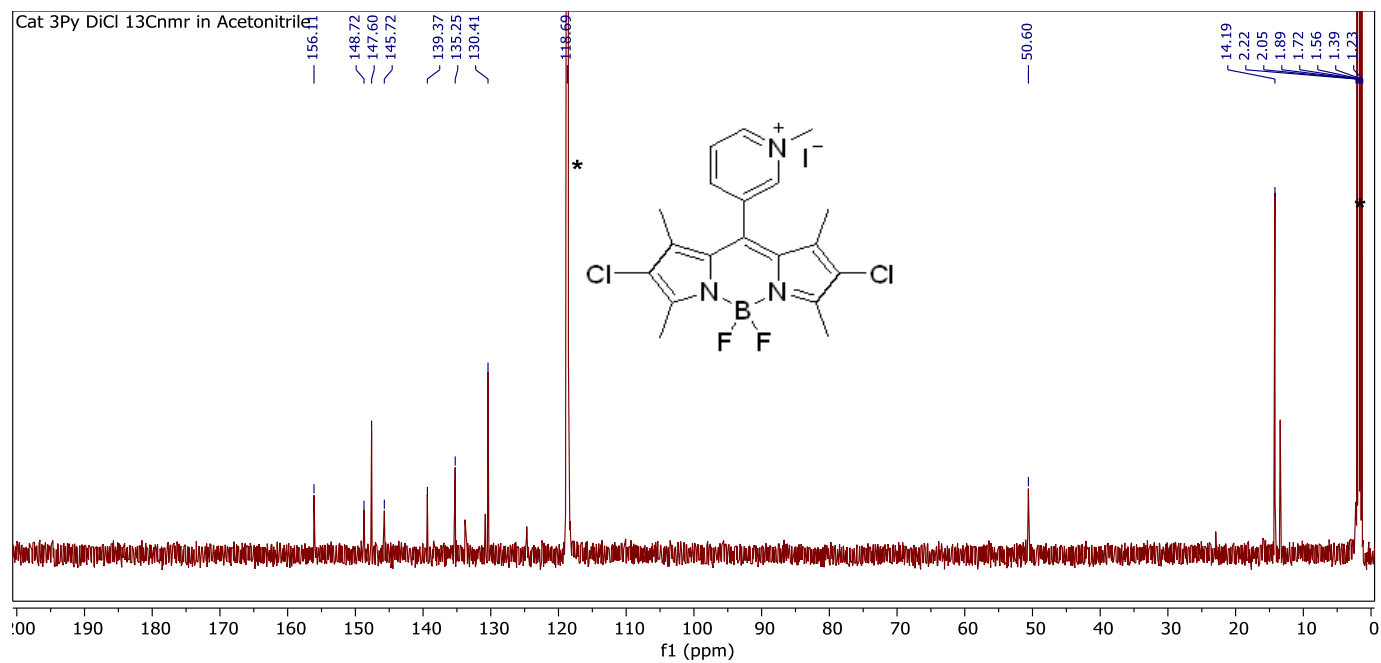

**Figure S25.** <sup>13</sup>C NMR of BODIPY 3catPyCl<sub>2</sub> in acetonitrile-d<sub>3</sub>

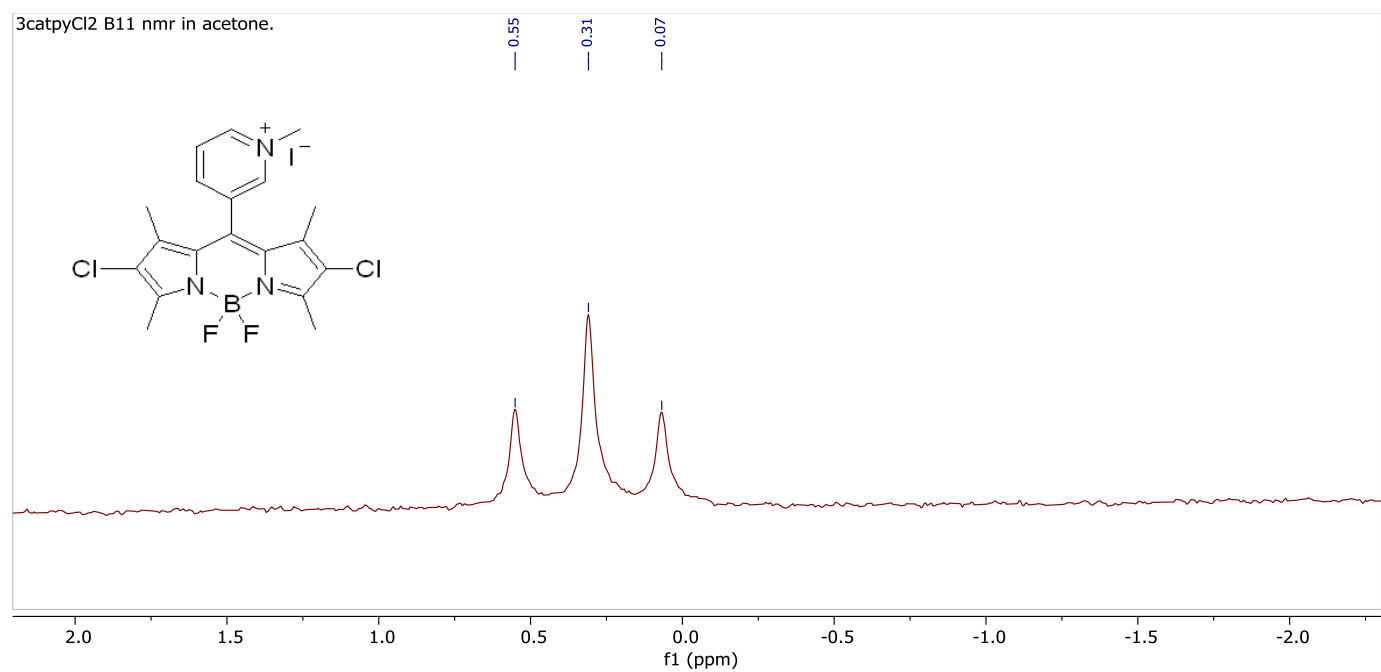

**Figure S26.** <sup>11</sup>B NMR of BODIPY 3catPyCl<sub>2</sub> in acetone-d<sub>6</sub>
